# Supplementary material
Source: publisher figshare collection journal article supplement (https://frontiersin.figshare.com/ndownloader/files/17291873)

# checkCIF/PLATON report

You have not supplied any structure factors. As a result the full set of tests cannot be run.

THIS REPORT IS FOR GUIDANCE ONLY. IF USED AS PART OF A REVIEW PROCEDURE FOR PUBLICATION, IT SHOULD NOT REPLACE THE EXPERTISE OF AN EXPERIENCED CRYSTALLOGRAPHIC REFEREE.

No syntax errors found.      CIF dictionary      Interpreting this report

## Datablock: mx200

---

|                 |                         |                                   |
|-----------------|-------------------------|-----------------------------------|
| Bond precision: | C-C = 0.0059 A          | Wavelength=0.71073                |
| Cell:           | a=12.267(3)             | b=13.680(3)      c=17.162(3)      |
|                 | alpha=67.26(3)          | beta=85.66(3)      gamma=89.71(3) |
| Temperature:    | 173 K                   |                                   |
|                 | Calculated              | Reported                          |
| Volume          | 2647.6(12)              | 2647.5(9)                         |
| Space group     | P 1                     | P1                                |
| Hall group      | P 1                     | ?                                 |
| Moiety formula  | C24 H24 N8 O, C2 H6 O S | ?                                 |
| Sum formula     | C26 H30 N8 O2 S         | C26 H30 N8 O2 S                   |
| Mr              | 518.64                  | 518.64                            |
| Dx,g cm-3       | 1.301                   | 1.301                             |
| Z               | 4                       | 4                                 |
| Mu (mm-1)       | 0.162                   | 0.162                             |
| F000            | 1096.0                  | 1096.0                            |
| F000'           | 1096.85                 |                                   |
| h,k,lmax        | 15,17,22                | 15,17,22                          |
| Nref            | 24254[ 12127]           | 23971                             |
| Tmin,Tmax       | 0.973,0.986             | 0.961,0.986                       |
| Tmin'           | 0.960                   |                                   |

Correction method= # Reported T Limits: Tmin=0.961 Tmax=0.986  
AbsCorr = NUMERICAL

Data completeness= 1.98/0.99      Theta(max)= 27.470

R(reflections)= 0.0688( 21101)      wR2(reflections)= 0.1851( 23971)

S = 1.063      Npar= 1438

---

The following ALERTS were generated. Each ALERT has the format

**test-name\_ALERT\_alert-type\_alert-level.**

Click on the hyperlinks for more details of the test.

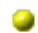

### Alert level C

|                   |                                                 |        |            |              |           |
|-------------------|-------------------------------------------------|--------|------------|--------------|-----------|
| PLAT234_ALERT_4_C | Large Hirshfeld Difference N2                   | --C21' | .          | 0.16 Ang.    |           |
| PLAT260_ALERT_2_C | Large Average Ueq of Residue Including          |        | S4         | 0.106 Check  |           |
| PLAT260_ALERT_2_C | Large Average Ueq of Residue Including          |        | S2'        | 0.103 Check  |           |
| PLAT260_ALERT_2_C | Large Average Ueq of Residue Including          |        | S4'        | 0.167 Check  |           |
| PLAT340_ALERT_3_C | Low Bond Precision on C-C Bonds .....           |        |            | 0.00592 Ang. |           |
| PLAT412_ALERT_2_C | Short Intra XH3 .. XHn                          | H2A    | ..H24A     | .            | 1.84 Ang. |
|                   |                                                 |        | x,y,z =    | 1_555        | Check     |
| PLAT412_ALERT_2_C | Short Intra XH3 .. XHn                          | H12A   | ..H22A     | .            | 1.87 Ang. |
|                   |                                                 |        | x,y,z =    | 1_555        | Check     |
| PLAT412_ALERT_2_C | Short Intra XH3 .. XHn                          | H2BA   | ..H24D     | .            | 1.88 Ang. |
|                   |                                                 |        | x,y,z =    | 1_555        | Check     |
| PLAT412_ALERT_2_C | Short Intra XH3 .. XHn                          | H4BA   | ..H21G     | .            | 1.85 Ang. |
|                   |                                                 |        | x,y,z =    | 1_555        | Check     |
| PLAT412_ALERT_2_C | Short Intra XH3 .. XHn                          | H12B   | ..H22D     | .            | 1.87 Ang. |
|                   |                                                 |        | x,y,z =    | 1_555        | Check     |
| PLAT412_ALERT_2_C | Short Intra XH3 .. XHn                          | H14B   | ..H23D     | .            | 1.82 Ang. |
|                   |                                                 |        | x,y,z =    | 1_555        | Check     |
| PLAT412_ALERT_2_C | Short Intra XH3 .. XHn                          | H2CA   | ..H24G     | .            | 1.84 Ang. |
|                   |                                                 |        | x,y,z =    | 1_555        | Check     |
| PLAT412_ALERT_2_C | Short Intra XH3 .. XHn                          | H4CA   | ..H21J     | .            | 1.85 Ang. |
|                   |                                                 |        | x,y,z =    | 1_555        | Check     |
| PLAT412_ALERT_2_C | Short Intra XH3 .. XHn                          | H12C   | ..H22G     | .            | 1.86 Ang. |
|                   |                                                 |        | x,y,z =    | 1_555        | Check     |
| PLAT412_ALERT_2_C | Short Intra XH3 .. XHn                          | H14C   | ..H23G     | .            | 1.86 Ang. |
|                   |                                                 |        | x,y,z =    | 1_555        | Check     |
| PLAT412_ALERT_2_C | Short Intra XH3 .. XHn                          | H2DA   | ..H24J     | .            | 1.87 Ang. |
|                   |                                                 |        | x,y,z =    | 1_555        | Check     |
| PLAT412_ALERT_2_C | Short Intra XH3 .. XHn                          | H4DA   | ..H21M     | .            | 1.88 Ang. |
|                   |                                                 |        | x,y,z =    | 1_555        | Check     |
| PLAT413_ALERT_2_C | Short Inter XH3 .. XHn                          | H19B   | ..H22H     | .            | 2.12 Ang. |
|                   |                                                 |        | 1+x,y,z =  | 1_655        | Check     |
| PLAT413_ALERT_2_C | Short Inter XH3 .. XHn                          | H23E   | ..H23K     | .            | 2.01 Ang. |
|                   |                                                 |        | x,y,-1+z = | 1_554        | Check     |
| PLAT480_ALERT_4_C | Long H...A H-Bond Reported H1C                  | ..S2   | .          | 2.98 Ang.    |           |
| PLAT480_ALERT_4_C | Long H...A H-Bond Reported H1D                  | ..S1   | .          | 2.91 Ang.    |           |
| PLAT601_ALERT_2_C | Structure Contains Solvent Accessible VOIDS of  |        | .          | 31 Ang**3    |           |
| PLAT790_ALERT_4_C | Centre of Gravity not Within Unit Cell: Resd. # |        |            | 1 Note       |           |
|                   | C24 H24 N8 O                                    |        |            |              |           |

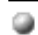

### Alert level G

|                   |                                                  |           |        |        |
|-------------------|--------------------------------------------------|-----------|--------|--------|
| PLAT002_ALERT_2_G | Number of Distance or Angle Restraints on AtSite |           | 27     | Note   |
| PLAT003_ALERT_2_G | Number of Uiso or Uij Restrained non-H Atoms ... |           | 18     | Report |
| PLAT005_ALERT_5_G | No Embedded Refinement Details Found in the CIF  |           | Please | Do !   |
| PLAT007_ALERT_5_G | Number of Unrefined Donor-H Atoms .....          |           | 6      | Report |
| PLAT066_ALERT_1_G | Predicted and Reported Tmin&Tmax Range Identical |           | ?      | Check  |
| PLAT112_ALERT_2_G | ADDSYM Detects New (Pseudo) Symm. Elem           | 2         | 99     | %Fit   |
| PLAT113_ALERT_2_G | ADDSYM Suggests Possible Pseudo/New Space Group  |           | C2     | Check  |
| PLAT152_ALERT_1_G | The Supplied and Calc. Volume s.u. Differ by ... |           | 3      | Units  |
| PLAT154_ALERT_1_G | The s.u.'s on the Cell Angles are Equal ..(Note) |           | 0.03   | Degree |
| PLAT301_ALERT_3_G | Main Residue Disorder .....                      | (Resd 1 ) | 3%     | Note   |
| PLAT301_ALERT_3_G | Main Residue Disorder .....                      | (Resd 2 ) | 3%     | Note   |
| PLAT301_ALERT_3_G | Main Residue Disorder .....                      | (Resd 3 ) | 3%     | Note   |
| PLAT302_ALERT_4_G | Anion/Solvent/Minor-Residue Disorder (Resd 6 )   |           | 100%   | Note   |
| PLAT302_ALERT_4_G | Anion/Solvent/Minor-Residue Disorder (Resd 8 )   |           | 100%   | Note   |
| PLAT302_ALERT_4_G | Anion/Solvent/Minor-Residue Disorder (Resd 9 )   |           | 100%   | Note   |
| PLAT302_ALERT_4_G | Anion/Solvent/Minor-Residue Disorder (Resd 10 )  |           | 100%   | Note   |
| PLAT304_ALERT_4_G | Non-Integer Number of Atoms in .....             | Resd 6    | 7.80   | Check  |
| PLAT304_ALERT_4_G | Non-Integer Number of Atoms in .....             | Resd 8    | 5.33   | Check  |
| PLAT304_ALERT_4_G | Non-Integer Number of Atoms in .....             | Resd 9    | 2.20   | Check  |

|                   |                                                               |         |       |       |
|-------------------|---------------------------------------------------------------|---------|-------|-------|
| PLAT304_ALERT_4_G | Non-Integer Number of Atoms in .....                          | Resd 10 | 4.67  | Check |
| PLAT380_ALERT_4_G | Incorrectly? Oriented X(sp <sup>2</sup> )-Methyl Moiety ..... |         | C22   | Check |
| PLAT380_ALERT_4_G | Incorrectly? Oriented X(sp <sup>2</sup> )-Methyl Moiety ..... |         | C24   | Check |
| PLAT380_ALERT_4_G | Incorrectly? Oriented X(sp <sup>2</sup> )-Methyl Moiety ..... |         | C24B  | Check |
| PLAT380_ALERT_4_G | Incorrectly? Oriented X(sp <sup>2</sup> )-Methyl Moiety ..... |         | C21C  | Check |
| PLAT380_ALERT_4_G | Incorrectly? Oriented X(sp <sup>2</sup> )-Methyl Moiety ..... |         | C24C  | Check |
| PLAT380_ALERT_4_G | Incorrectly? Oriented X(sp <sup>2</sup> )-Methyl Moiety ..... |         | C22D  | Check |
| PLAT380_ALERT_4_G | Incorrectly? Oriented X(sp <sup>2</sup> )-Methyl Moiety ..... |         | C23D  | Check |
| PLAT380_ALERT_4_G | Incorrectly? Oriented X(sp <sup>2</sup> )-Methyl Moiety ..... |         | C24D  | Check |
| PLAT432_ALERT_2_G | Short Inter X...Y Contact N3B ..C27'                          |         | 2.94  | Ang.  |
|                   | x,-1+y,z =                                                    | 1_545   | Check |       |
| PLAT720_ALERT_4_G | Number of Unusual/Non-Standard Labels .....                   |         | 17    | Note  |
| PLAT779_ALERT_4_G | Suspect or Irrelevant (Bond) Angle in CIF .... #              |         | 98    | Check |
|                   | C21' -N2 -C21 1.555 1.555 1.555                               |         | 40.20 | Deg.  |
| PLAT779_ALERT_4_G | Suspect or Irrelevant (Bond) Angle in CIF .... #              |         | 202   | Check |
|                   | C3B -O1B -H3BA 1.555 1.555 1.555                              |         | 9.30  | Deg.  |
| PLAT779_ALERT_4_G | Suspect or Irrelevant (Bond) Angle in CIF .... #              |         | 205   | Check |
|                   | C13B -O1E -H13C 1.555 1.555 1.555                             |         | 17.00 | Deg.  |
| PLAT779_ALERT_4_G | Suspect or Irrelevant (Bond) Angle in CIF .... #              |         | 232   | Check |
|                   | O1B -C3B -H3BA 1.555 1.555 1.555                              |         | 3.80  | Deg.  |
| PLAT779_ALERT_4_G | Suspect or Irrelevant (Bond) Angle in CIF .... #              |         | 265   | Check |
|                   | O1E -C13B -H13C 1.555 1.555 1.555                             |         | 7.00  | Deg.  |
| PLAT779_ALERT_4_G | Suspect or Irrelevant (Bond) Angle in CIF .... #              |         | 314   | Check |
|                   | C3C -O1C -H3CA 1.555 1.555 1.555                              |         | 5.30  | Deg.  |
| PLAT779_ALERT_4_G | Suspect or Irrelevant (Bond) Angle in CIF .... #              |         | 317   | Check |
|                   | C13C -O1F -H13D 1.555 1.555 1.555                             |         | 35.50 | Deg.  |
| PLAT779_ALERT_4_G | Suspect or Irrelevant (Bond) Angle in CIF .... #              |         | 346   | Check |
|                   | O1C -C3C -H3CA 1.555 1.555 1.555                              |         | 2.30  | Deg.  |
| PLAT779_ALERT_4_G | Suspect or Irrelevant (Bond) Angle in CIF .... #              |         | 379   | Check |
|                   | O1F -C13C -H13D 1.555 1.555 1.555                             |         | 23.60 | Deg.  |
| PLAT790_ALERT_4_G | Centre of Gravity not Within Unit Cell: Resd. #               |         | 2     | Note  |
|                   | C24 H24 N8 O                                                  |         |       |       |
| PLAT790_ALERT_4_G | Centre of Gravity not Within Unit Cell: Resd. #               |         | 3     | Note  |
|                   | C24 H24 N8 O                                                  |         |       |       |
| PLAT790_ALERT_4_G | Centre of Gravity not Within Unit Cell: Resd. #               |         | 4     | Note  |
|                   | C24 H24 N8 O                                                  |         |       |       |
| PLAT790_ALERT_4_G | Centre of Gravity not Within Unit Cell: Resd. #               |         | 6     | Note  |
|                   | C2 H6 O S                                                     |         |       |       |
| PLAT790_ALERT_4_G | Centre of Gravity not Within Unit Cell: Resd. #               |         | 8     | Note  |
|                   | C2 H6 O S                                                     |         |       |       |
| PLAT790_ALERT_4_G | Centre of Gravity not Within Unit Cell: Resd. #               |         | 9     | Note  |
|                   | C2 H6 O S                                                     |         |       |       |
| PLAT790_ALERT_4_G | Centre of Gravity not Within Unit Cell: Resd. #               |         | 10    | Note  |
|                   | C2 H6 O S                                                     |         |       |       |
| PLAT860_ALERT_3_G | Number of Least-Squares Restraints .....                      |         | 184   | Note  |
| PLAT899_ALERT_4_G | SHELXL97 is Deprecated and Succeeded by SHELXL                |         | 2018  | Note  |

---

0 **ALERT level A** = Most likely a serious problem - resolve or explain  
 0 **ALERT level B** = A potentially serious problem, consider carefully  
 23 **ALERT level C** = Check. Ensure it is not caused by an omission or oversight  
 48 **ALERT level G** = General information/check it is not something unexpected

3 ALERT type 1 CIF construction/syntax error, inconsistent or missing data  
 23 ALERT type 2 Indicator that the structure model may be wrong or deficient  
 5 ALERT type 3 Indicator that the structure quality may be low  
 38 ALERT type 4 Improvement, methodology, query or suggestion  
 2 ALERT type 5 Informative message, check

---

It is advisable to attempt to resolve as many as possible of the alerts in all categories. Often the minor alerts point to easily fixed oversights, errors and omissions in your CIF or refinement strategy, so attention to these fine details can be worthwhile. In order to resolve some of the more serious problems it may be necessary to carry out additional measurements or structure refinements. However, the purpose of your study may justify the reported deviations and the more serious of these should normally be commented upon in the discussion or experimental section of a paper or in the "special\_details" fields of the CIF. checkCIF was carefully designed to identify outliers and unusual parameters, but every test has its limitations and alerts that are not important in a particular case may appear. Conversely, the absence of alerts does not guarantee there are no aspects of the results needing attention. It is up to the individual to critically assess their own results and, if necessary, seek expert advice.

### **Publication of your CIF in IUCr journals**

A basic structural check has been run on your CIF. These basic checks will be run on all CIFs submitted for publication in IUCr journals (*Acta Crystallographica*, *Journal of Applied Crystallography*, *Journal of Synchrotron Radiation*); however, if you intend to submit to *Acta Crystallographica Section C* or *E* or *IUCrData*, you should make sure that full publication checks are run on the final version of your CIF prior to submission.

### **Publication of your CIF in other journals**

Please refer to the *Notes for Authors* of the relevant journal for any special instructions relating to CIF submission.

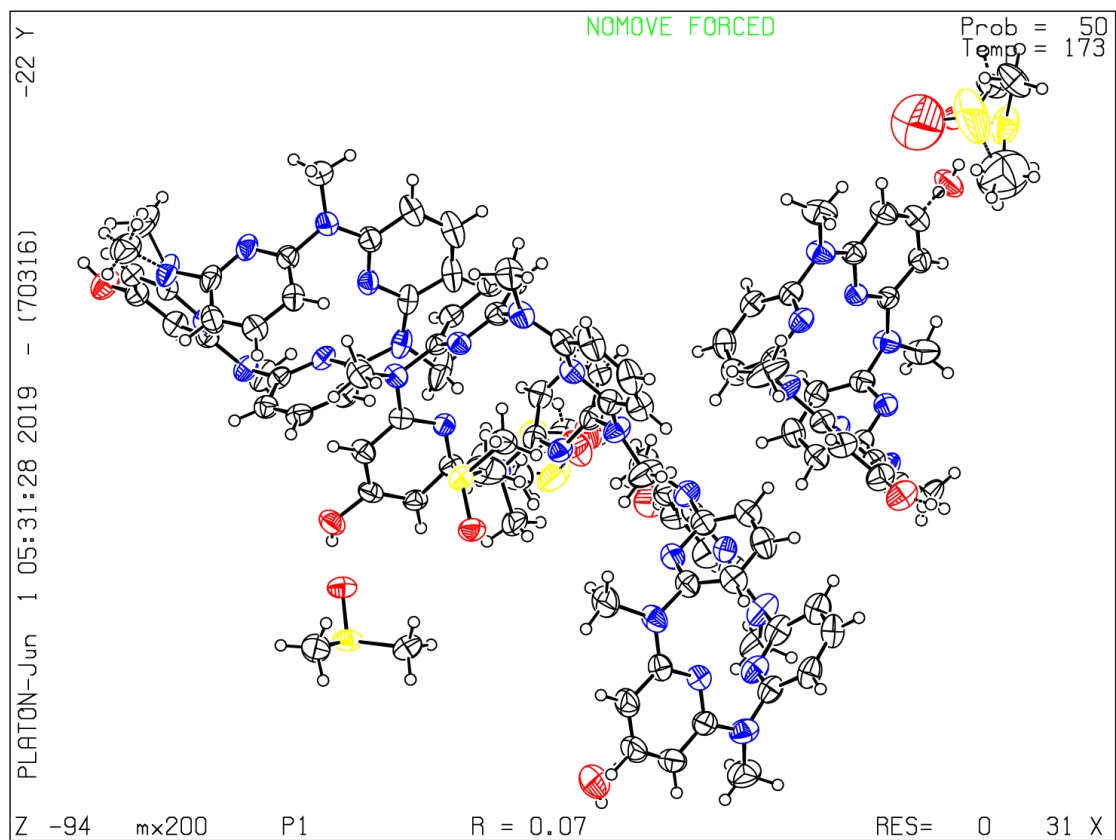

Supplement: Supplementary file [file 17291873]
